# Supplementary material for: Caffeic Acid Phenethyl Ester and Caffeamide Derivatives Suppress Oral Squamous Cell Carcinoma Cells
Source: MDPI journal article supplement (doi:10.3390/ijms24129819), 2023-06-06
Supplement: s1 [file s1]

**Supplementary Table S1.** List of antibodies for Western blot.

| <b>Antibody</b> | <b>Brand</b>      | <b>Cat. Number,</b> | <b>Dilution</b> |
|-----------------|-------------------|---------------------|-----------------|
| cyclin D1       | Cell Signaling    | 2978                | 1:1000          |
| cyclin A2       | Cell Signaling    | 4656                | 1:1000          |
| cyclin B1       | Cell Signaling    | 4138                | 1:1000          |
| CDK2            | Cell Signaling    | 2546                | 1:1000          |
| CDK1            | Cell Signaling    | 9112                | 1:1000          |
| P21             | Cell Signaling    | 2947                | 1:1000          |
| Nrf-2           | Cell Signaling    | 12721               | 1:1000          |
| Catalase        | Santa Cruz        | sc-271803           | 1:1000          |
| HO-1            | Santa Cruz        | sc-136960           | 1:1000          |
| SOD-1           | Santa Cruz        | sc-515404           | 1:1000          |
| NQO1            | Santa Cruz        | sc-32793            | 1:1000          |
| p-mTOR          | Cell Signaling    | 2971                | 1:1000          |
| p-ULK1          | Cell Signaling    | 6888                | 1:1000          |
| P62,            | Proteintech       | 18420-1-AP          | 1:1000          |
| LC-3            | Cell Signaling    | 4108                | 1:1000          |
| HIF1- $\alpha$  | Santa Cruz        | sc-53546            | 1:1000          |
| GAPDH           | Novus Biologicals | NB300-221           | 1:10000         |
